# Supplementary material for: Ultrafast synthesis of magnetic hollow carbon nanospheres for the adsorption of quinoline from coking wastewater
Source: Royal Society of Chemistry journal article supplement (doi:10.1039/d0nj00944j), 2020-01-01
Supplement: d0nj00944j1.pdf [file d0nj00944j1.pdf]

## Electronic Supplementary Information

*for*

### Ultrafast synthesis of magnetic hollow carbon nanospheres for the adsorption of quinoline from coking wastewater

Yan Cui<sup>a,b</sup>, Weiwei Kang<sup>a</sup>, Lei Qin<sup>a,c</sup>, Jinghong Ma<sup>b</sup>, Xuguang Liu<sup>a,d,\*</sup>,

Yongzhen Yang<sup>a,\*</sup>

<sup>a</sup> *Key Laboratory of Interface Science and Engineering in Advanced Materials (Taiyuan*

*University of Technology), Ministry of Education, Taiyuan 030024, China*

<sup>b</sup> *College of Chemistry and Chemical Engineering, Taiyuan University of Technology, Taiyuan*

*030024, China*

<sup>c</sup> *Department of Chemical Engineering, Monash University, Australia*

<sup>d</sup> *Institute of New Carbon Materials, Taiyuan University of Technology, Taiyuan 030024, China*

**\*Corresponding authors.**

E-mail addresses: liuxuguang@tyut.edu.cn (X. Liu), yyztyut@126.com (Y. Yang).

### **Supplementary equations.**

The adsorption capacity  $q_t$  (mg g<sup>-1</sup>) and  $q_e$  (mg g<sup>-1</sup>) were determined, the equations are as follows:

$$q_t = V(C_0 - C_t)/m \quad (S-1)$$

$$q_e = V(C_0 - C_e)/m \quad (S-2)$$

where  $C_0$  (mg L<sup>-1</sup>),  $C_t$  (mg L<sup>-1</sup>) and  $C_e$  (mg L<sup>-1</sup>) are the concentrations of Q solution at time 0, time  $t$  and equilibrium, respectively.  $V$  (L) represents the volume of Q solution;  $m$  (g) is the weight of adsorbent.

### ***Kinetic models :***

The pseudo-first-order kinetic model (Eq. (S3)) and pseudo-second-order kinetic model (Eq. (S4)) can be described by the following equations:

$$\ln (q_e - q_t) = \ln q_e - k_1 t \quad (S-3)$$

$$t/q_t = 1/(k_2 q_e^2) + t/q_e \quad (S-4)$$

where  $q_t$  (mg g<sup>-1</sup>) and  $q_e$  (mg g<sup>-1</sup>) are the amounts of quinoline adsorbed on MHCNSs at time  $t$  (min) and at equilibrium, respectively.  $k_1$  (min<sup>-1</sup>) represents the pseudo-first-order kinetic rate constant;  $k_2$  (g mg<sup>-1</sup> min<sup>-1</sup>) represents the pseudo-second-order kinetic rate constant.

### ***Isotherm models :***

The Langmuir model (Eq. (S5)), Freundlich model (Eq. (S6)) and Langmuir–Freundlich model (Eq. (S7)) can be described by the following equations:

$$C_e/q_e = C_e/q_m + 1/(q_m K_L) \quad (S-5)$$

$$\ln q_e = \ln C_e/n + \ln K_F \quad (S-6)$$

$$q_e/q_m = (K_{L-F}C_e)^n / (1 + (K_{L-F}C_e)^n) \quad (S-7)$$

where  $C_e$  ( $\text{mg L}^{-1}$ ) represents the equilibrium concentration of quinoline in solution.  $q_e$  ( $\text{mg g}^{-1}$ ) represents the adsorption capacity of quinoline on MHCNSs at equilibrium.  $q_m$  ( $\text{mg g}^{-1}$ ) is the maximum adsorption capacity.  $K_L$  is Langmuir constant;  $K_F$  is Freundlich constant;  $K_{L-F}$  is Langmuir–Freundlich constant.  $n$  represents the empirical constant.

***Thermodynamic parameters :***

The thermodynamic parameters including standard enthalpy  $\Delta H^\theta$ , standard entropy  $\Delta S^\theta$  and standard Gibbs free energy  $\Delta G^\theta$  are acquired by the following equations:

$$\Delta G^\theta = -RT \ln K_c \quad (S-8)$$

$$\ln K_c = \Delta S^\theta / R - \Delta H^\theta / (RT) \quad (S-9)$$

where  $K_c$  is the thermodynamic equilibrium constant, obtained by Langmuir equation.  $T$  (K) and  $R$  ( $\text{J mol}^{-1} \text{K}^{-1}$ ) represent the absolute temperature and ideal gas constant, respectively.  $\Delta H^\theta$  and  $\Delta S^\theta$  can be achieved from the linear plots of  $\ln K_c$  versus  $1/T$ .

## Supplementary figures.

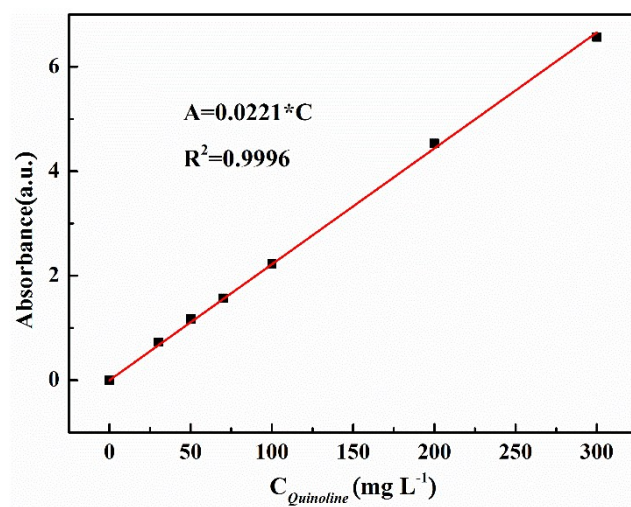

Figure S1. Standard curve of quinoline in water.

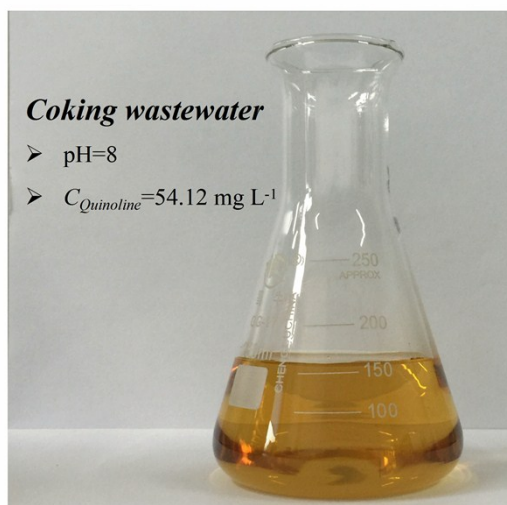

Figure S2. Photograph of coking wastewater after biological pretreatment.

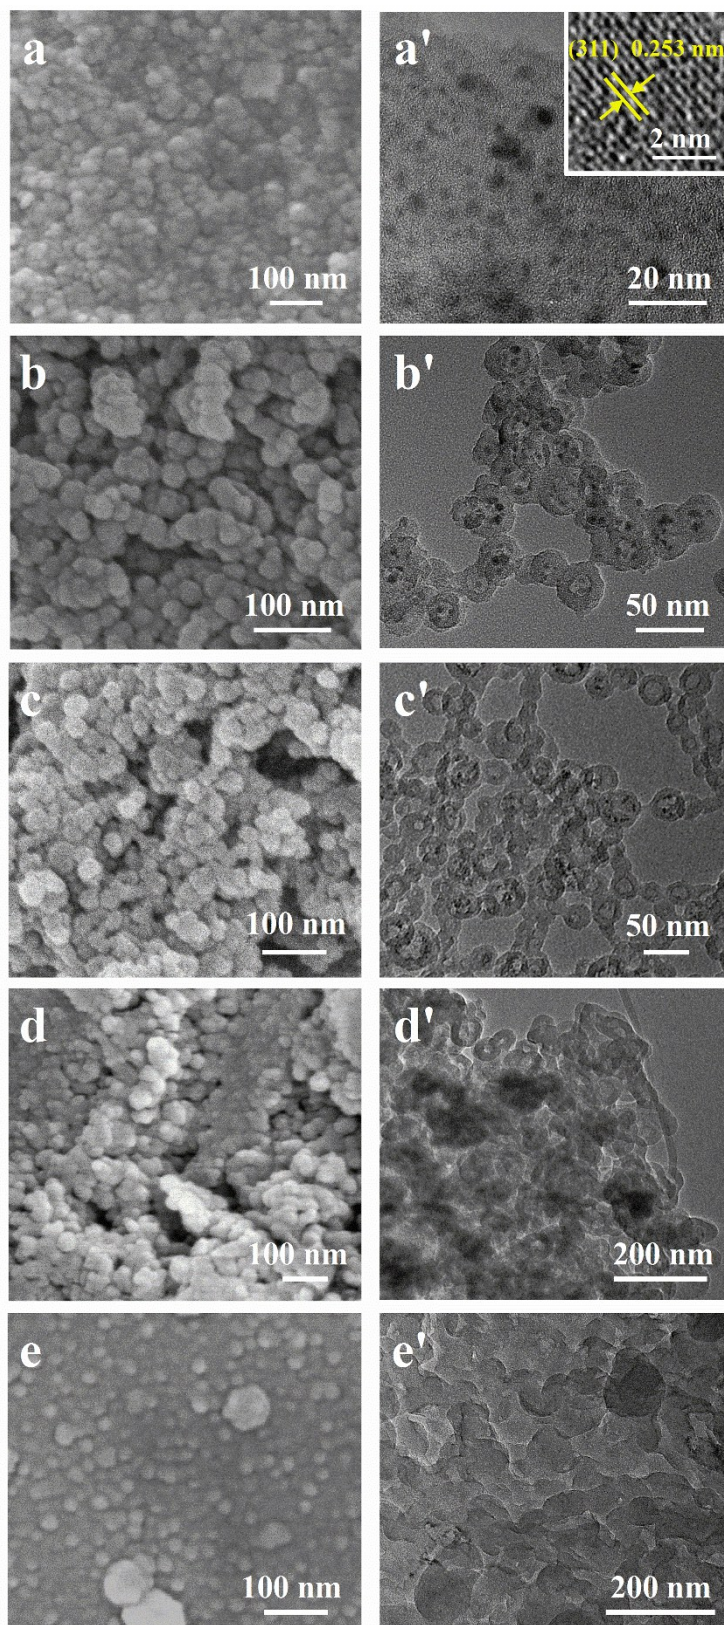

Figure S3. (a–e) FESEM images and (a'–e') TEM images of CNSs with different reaction conditions: (a, a') CNSs-1, (b, b') CNSs-2, (c, c') CNSs-3, (d, d') CNSs-4 and (e, e') CNSs-5.



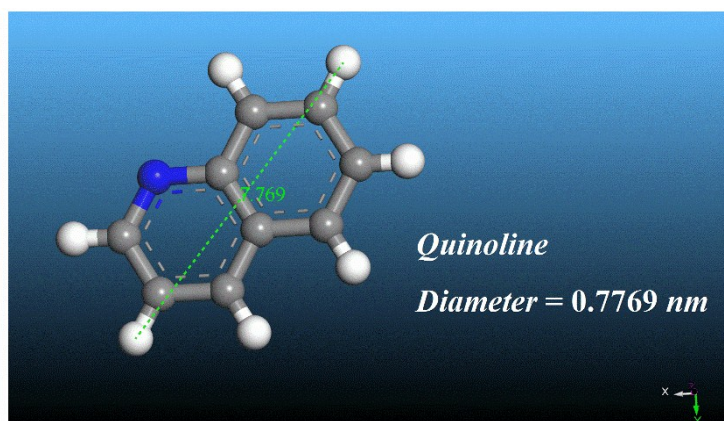

Figure S4. Molecular diameter of quinoline.

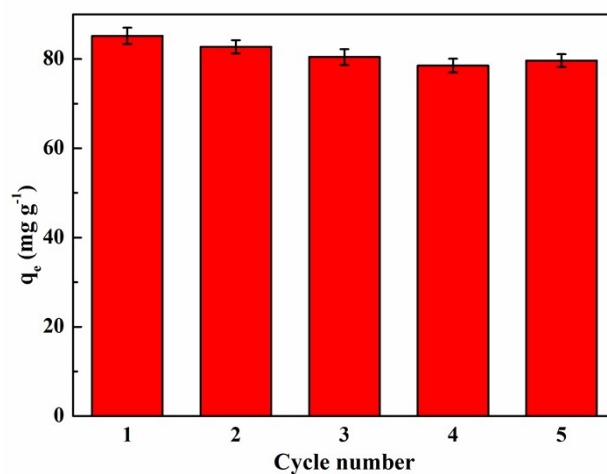

Figure S5. Regeneration tests of MHCNSs.

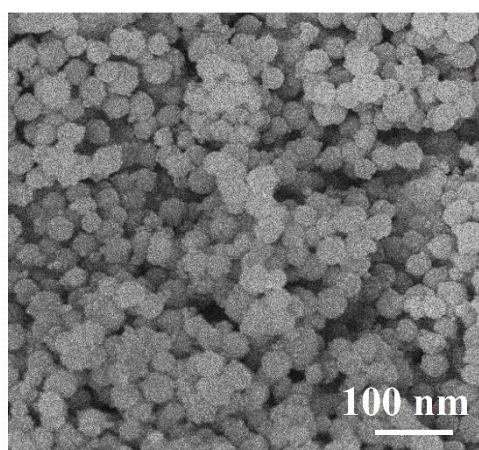

Figure S6. FESEM image of the regenerated MHCNSs.

## Supplementary tables.

Table S1. Textural properties of MHCNSs.

| Adsorbent | $S_{\text{BET}}$<br>( $\text{m}^2 \text{g}^{-1}$ ) | $S_{\text{micro}}$<br>( $\text{m}^2 \text{g}^{-1}$ ) | $S_{\text{meso}}$<br>( $\text{m}^2 \text{g}^{-1}$ ) | $V_{\text{total}}$<br>( $\text{cm}^3 \text{g}^{-1}$ ) | $V_{\text{micro}}$<br>( $\text{cm}^3 \text{g}^{-1}$ ) | $D_p$<br>(nm) |
|-----------|----------------------------------------------------|------------------------------------------------------|-----------------------------------------------------|-------------------------------------------------------|-------------------------------------------------------|---------------|
| MHCNSs    | 386.26                                             | 309.60                                               | 76.66                                               | 0.53                                                  | 0.16                                                  | 1.61          |

Table S2. Kinetic parameters on quinoline adsorption.

| T (K)      | Pseudo-first-order                           |                                              |                                |        | Pseudo-second-order                          |                                                 |        |
|------------|----------------------------------------------|----------------------------------------------|--------------------------------|--------|----------------------------------------------|-------------------------------------------------|--------|
|            | $q_{\text{e,exp}}$<br>( $\text{mg g}^{-1}$ ) | $q_{\text{e,cal}}$<br>( $\text{mg g}^{-1}$ ) | $k_1$<br>( $\text{min}^{-1}$ ) | $R^2$  | $q_{\text{e,cal}}$<br>( $\text{mg g}^{-1}$ ) | $k_2$<br>( $\text{g mg}^{-1} \text{min}^{-1}$ ) | $R^2$  |
| 288        | 94.48                                        | 90.30                                        | 0.2375                         | 0.9568 | 96.78                                        | 0.0041                                          | 0.9913 |
| MHCNSs 298 | 85.19                                        | 80.49                                        | 0.2522                         | 0.9704 | 86.95                                        | 0.0046                                          | 0.9926 |
| 308        | 78.21                                        | 74.01                                        | 0.1735                         | 0.9510 | 80.24                                        | 0.0034                                          | 0.9924 |

Table S3. Comparison of different adsorbents for quinoline removal from water.

| Adsorbent                      | Adsorbent<br>synthesis time | Adsorption capacity<br>( $\text{mg g}^{-1}$ ) | Equilibrium time<br>(min) | Reference |
|--------------------------------|-----------------------------|-----------------------------------------------|---------------------------|-----------|
| Granular activated<br>carbon   | –                           | 160.03                                        | 500                       | [14]      |
| Bagasse fly ash                | –                           | 31.18                                         | 500                       | [14]      |
| Bamboo charcoal                | 5–8 d                       | 32.50                                         | 1440                      | [15]      |
| Magnetic carbon<br>nanospheres | 24 h                        | 99.43                                         | 115                       | [49]      |
| Modified agricultural<br>waste | 1 h                         | 35.03                                         | 180                       | [56]      |
| MHCNSs                         | 80 s                        | 155.23                                        | 65                        | This work |

Table S4. Isotherm parameters on quinoline adsorption.

|        | $T$ (K) | Langmuir              |       |        | Freundlich |       |        | Langmuir–Freundlich   |           |      |        |
|--------|---------|-----------------------|-------|--------|------------|-------|--------|-----------------------|-----------|------|--------|
|        |         | $q_m$                 | $K_L$ | $R^2$  | $n$        | $K_F$ | $R^2$  | $q_m$                 | $K_{L-F}$ | $n$  | $R^2$  |
|        |         | (mg g <sup>-1</sup> ) |       |        |            |       |        | (mg g <sup>-1</sup> ) |           |      |        |
|        | 288     | 145.46                | 0.87  | 0.9523 | 8.26       | 83.12 | 0.8274 | 153.43                | 0.87      | 0.70 | 0.9812 |
| MHCNSs | 298     | 151.50                | 0.17  | 0.9946 | 5.46       | 58.99 | 0.8769 | 156.76                | 0.21      | 0.85 | 0.9995 |
|        | 308     | 155.43                | 0.08  | 0.9821 | 4.26       | 43.76 | 0.8376 | 148.66                | 0.05      | 1.23 | 0.9852 |

Table S5. Thermodynamic parameters on quinoline adsorption.

|        | $T$ (K) | $\Delta G^\theta$       | $\Delta H^\theta$       | $\Delta S^\theta$                      |
|--------|---------|-------------------------|-------------------------|----------------------------------------|
|        |         | (kJ mol <sup>-1</sup> ) | (kJ mol <sup>-1</sup> ) | (J mol <sup>-1</sup> K <sup>-1</sup> ) |
|        | 288     | -37.45                  |                         |                                        |
| MHCNSs | 298     | -34.73                  | -88.08                  | -176.85                                |
|        | 308     | -33.95                  |                         |                                        |

## References

1. J. Du, L. Liu, Y.F. Yu, Y. Zhang and A.B. Chen, *Chinese Chemical Letters*, 2019, **30**, 1423–1427.
2. C. Dong, Z.H. Li, L. Zhang, G.H. Li, H.C. Yao, J.S. Wang, Q.C. Liu and Z.J. Li, *Diamond and Related Materials*, 2019, **92**, 32–40.
3. Z.S. Wang and F.S. Li, *Materials Letters*, 2008, **63**, 58–60.
